# Supplementary material for: Weight Gain Associated with COVID-19 Lockdown in Children and Adolescents: A Systematic Review and Meta-Analysis
Source: MDPI journal article supplement (doi:10.3390/nu13103668), 2021-10-19
Supplement: s1 [file s1]

Supplementary S2. Risk of bias assessment – Newcastle-Ottawa Scale

|                   |                 | Selection                        |                                     |                           |                                                                          | Comparability                              | Outcome               |                                                 |                                  |       |
|-------------------|-----------------|----------------------------------|-------------------------------------|---------------------------|--------------------------------------------------------------------------|--------------------------------------------|-----------------------|-------------------------------------------------|----------------------------------|-------|
| Source            | Study type      | Representativeness of the sample | Selection of the non-exposed cohort | Ascertainment of exposure | Demonstration that outcome of interest was not present at start of study | Comparability based on design and analysis | Assessment of outcome | Was follow up long enough for outcomes to occur | Adequacy of follow up of cohorts | Total |
| Agha et al.       | Cross-sectional |                                  | *                                   | *                         | *                                                                        | *                                          | *                     | *                                               | *                                | 7     |
| Cipolla et al.    | Cross-sectional |                                  | *                                   | *                         | *                                                                        | *                                          |                       | *                                               | *                                | 6     |
| Hourani et al.    | Cross-sectional | *                                | *                                   | *                         | *                                                                        | *                                          |                       | *                                               | *                                | 7     |
| Jarnig et al.     | Cohort          | *                                | *                                   | *                         | *                                                                        | *                                          | *                     | *                                               | *                                | 8     |
| Kim et al.        | Cohort          |                                  | *                                   | *                         | *                                                                        | *                                          | *                     | *                                               | *                                | 7     |
| Marigliano et al. | Cohort          |                                  | *                                   | *                         | *                                                                        | *                                          | *                     | *                                               | *                                | 7     |
| Mulugeta et al.   | Cohort          | *                                | *                                   | *                         | *                                                                        | *                                          | *                     | *                                               | *                                | 8     |
| Nassar et al.     | Cohort          |                                  | *                                   | *                         | *                                                                        | *                                          | *                     | *                                               | *                                | 7     |

|                       |                 |   |   |   |   |   |   |   |   |   |
|-----------------------|-----------------|---|---|---|---|---|---|---|---|---|
| Qiu et al.            | Cohort          | * | * | * | * | * | * | * | * | 8 |
| Riso et al.           | Cohort          |   | * | * | * | * | * | * | * | 7 |
| Wahl-Alexander et al. | Cross-sectional | * | * | * | * | * | * | * | * | 8 |
| Yang et al.           | Cohort          | * | * | * | * | * |   | * | * | 7 |
